# Supplementary material for: Induced Pluripotent Stem Cell-Derived Cardiomyocytes Therapy for Ischemic Heart Disease in Animal Model: A Meta-Analysis
Source: MDPI journal article supplement (doi:10.3390/ijms25020987), 2024-01-12
Supplement: s1 [file s1]

**Induced pluripotent Stem Cell-derived cardiomyocytes therapy for ischemic heart disease in animal model: Systematic Review and Meta-analysis**

**Search query:** ("iPScells" OR "induced pluripotent stem cells" OR "pluripotent stem cells" OR "reprogrammed stem cells") AND ("Ischemic Heart Disease" OR "coronary artery disease" OR "myocardial infarction" OR "heart ischemia" OR “agina” OR “arteriosclerosis coronary” OR “Myocardial Reperfusion”)

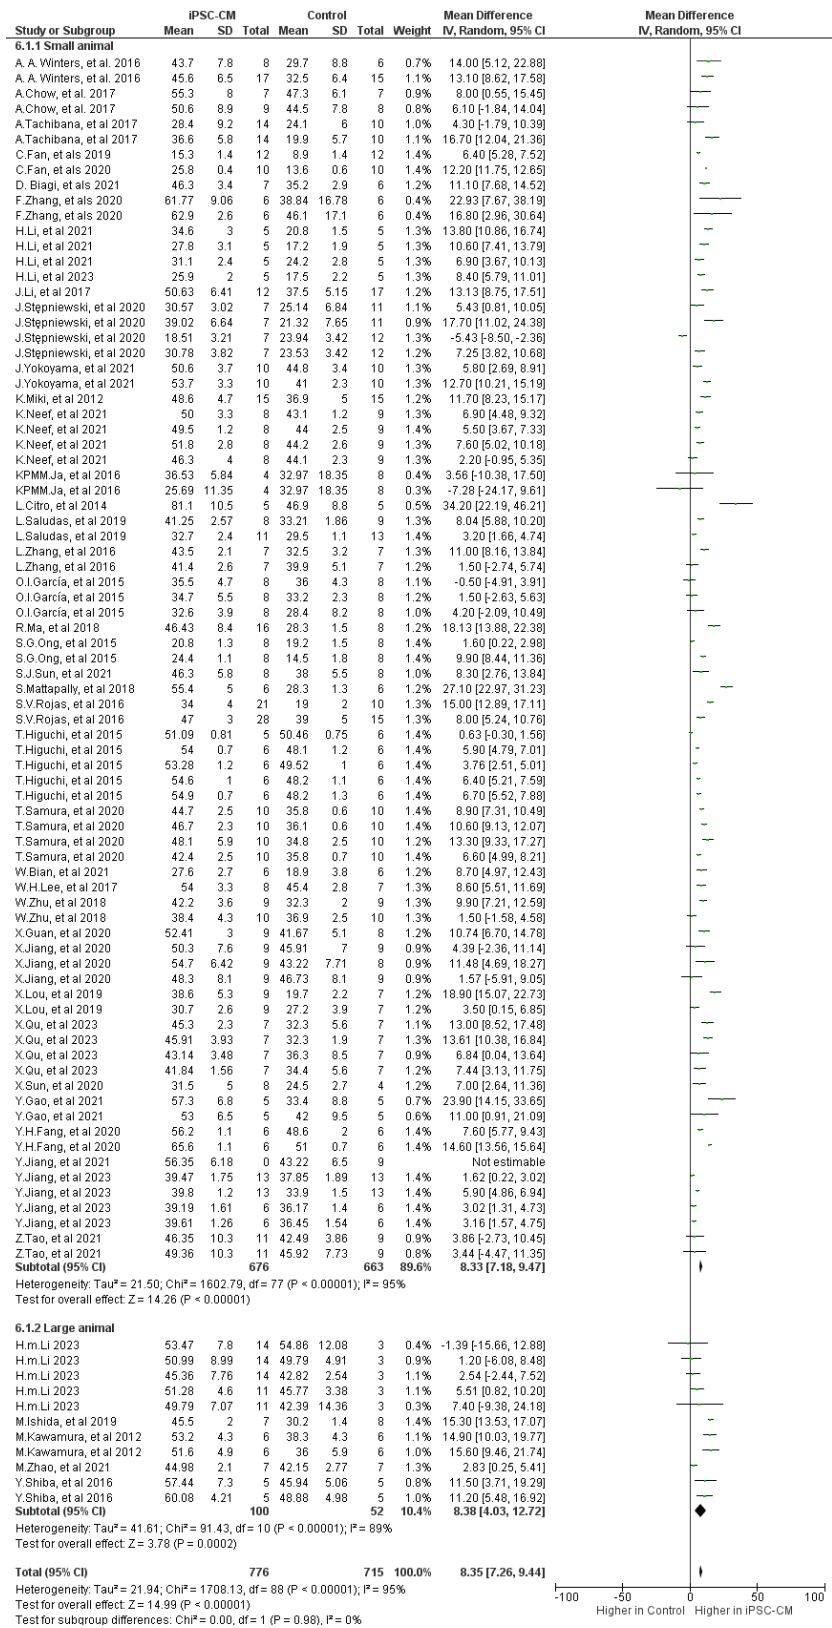

**Figure S1. Cell-based effect on animal ejection fraction by animal size**

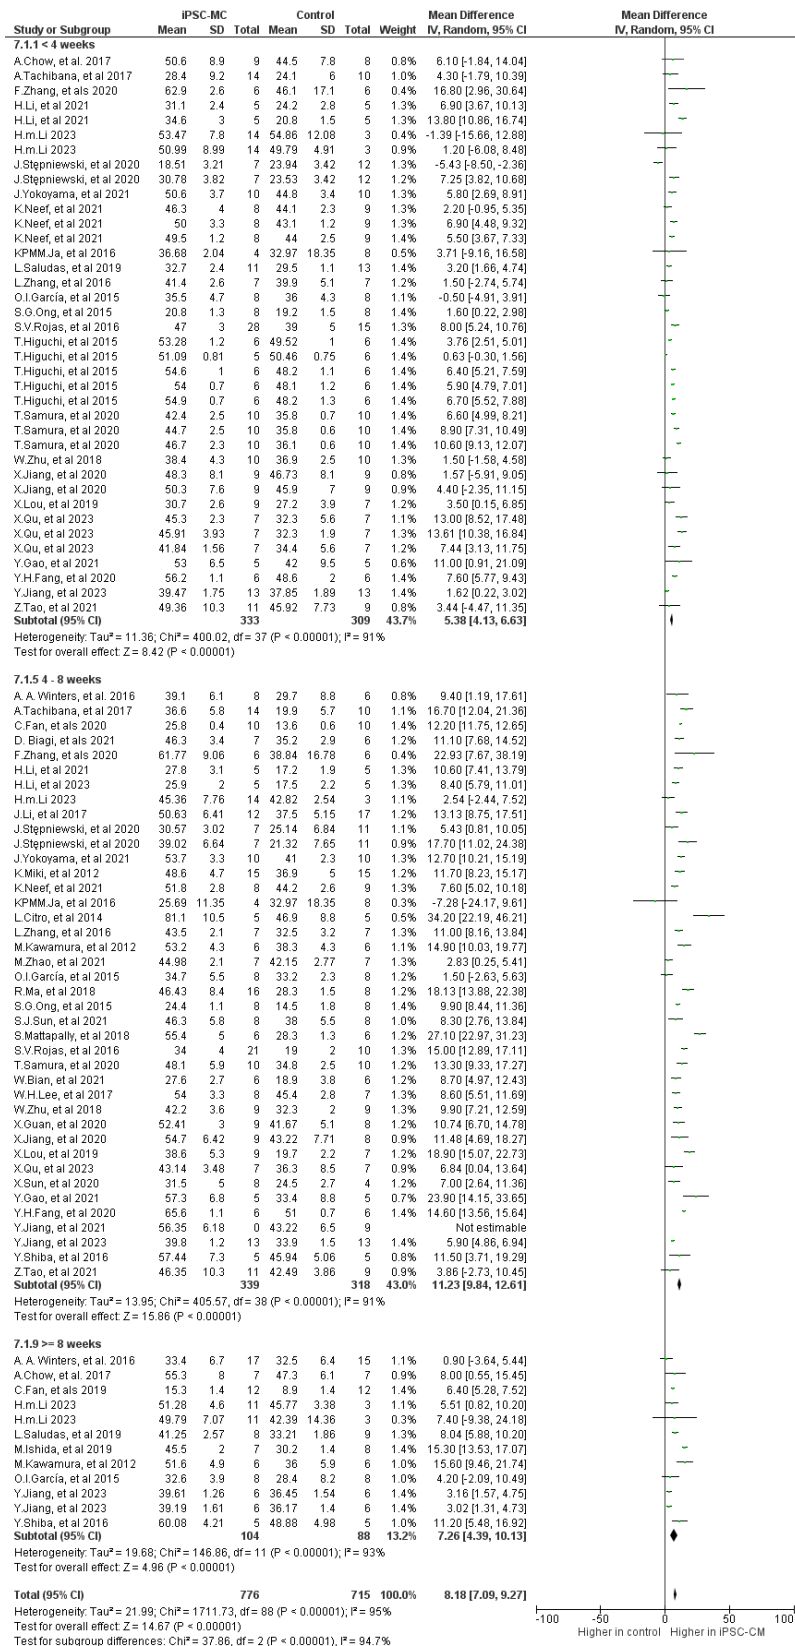

Figure S2. Cell-based effect on animal ejection fraction by follow-up time

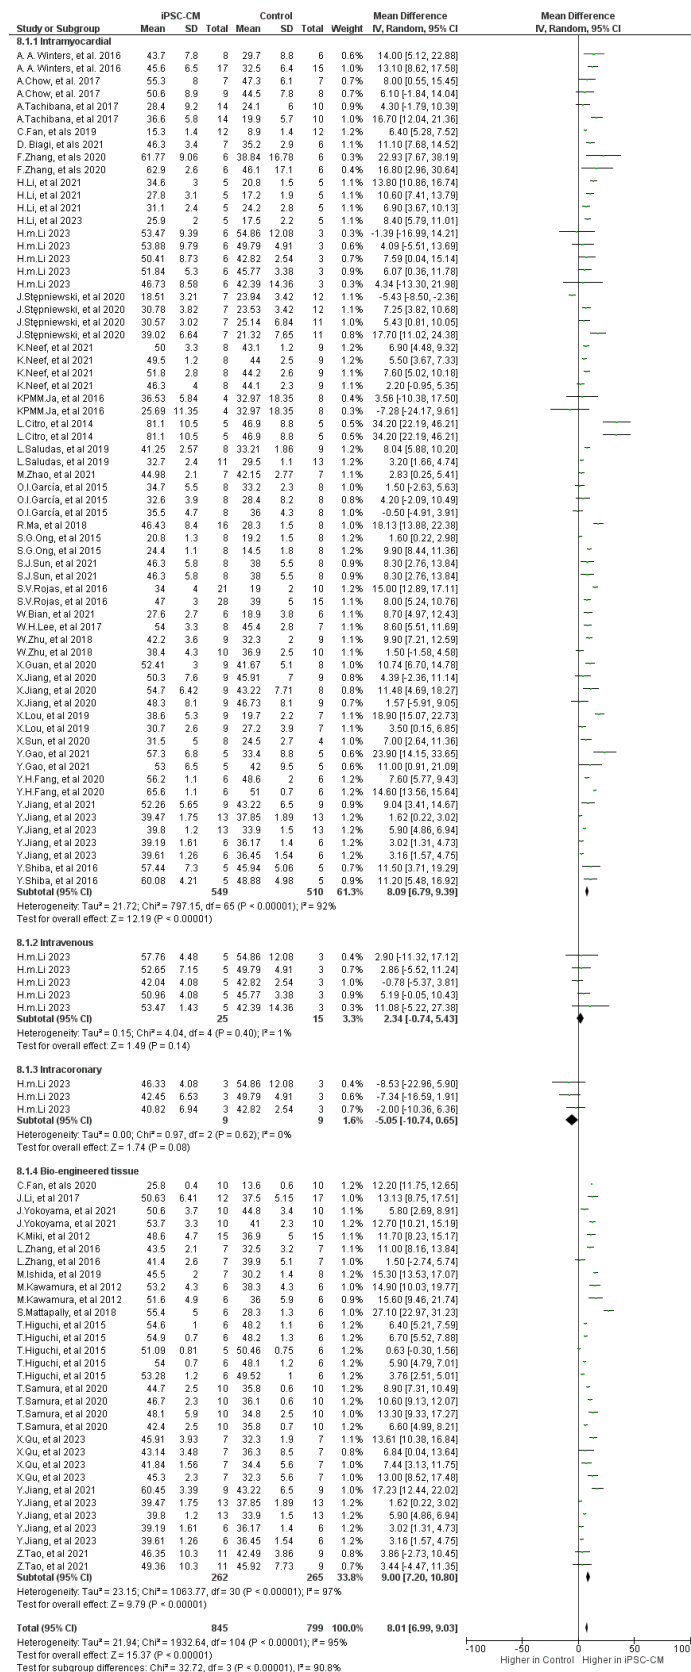

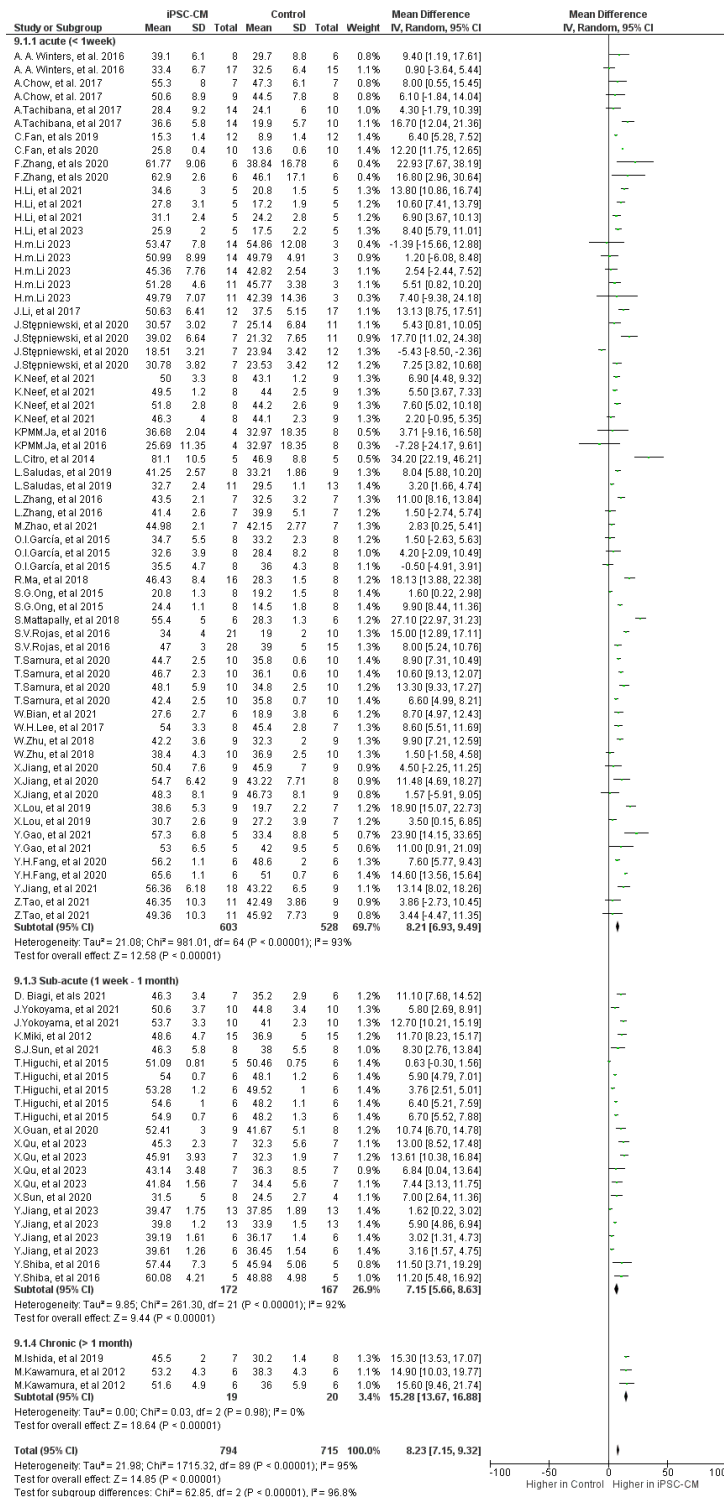

**Figure S4.** Cell-based effect on animal ejection fraction by time of injection

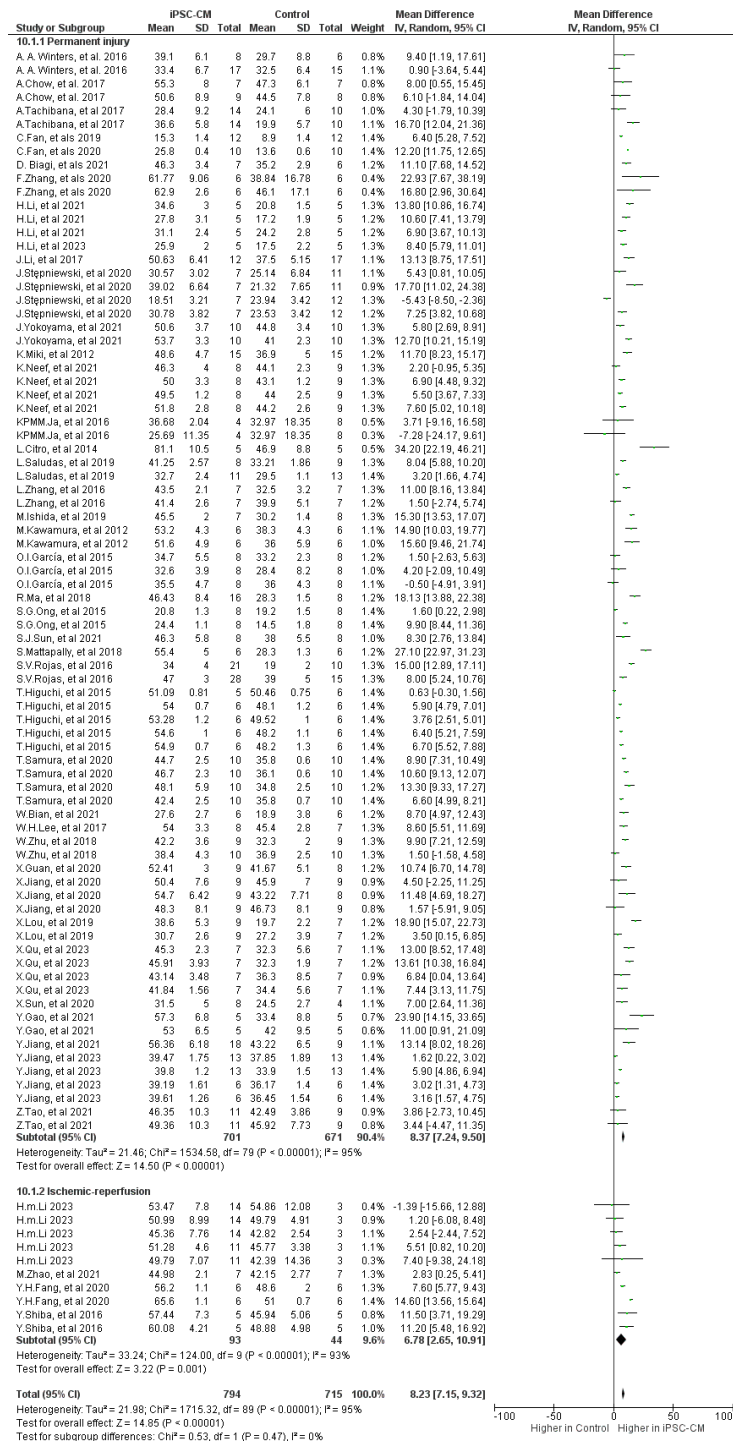

**Figure S5. Cell-based effect on animal ejection fraction by disease model**

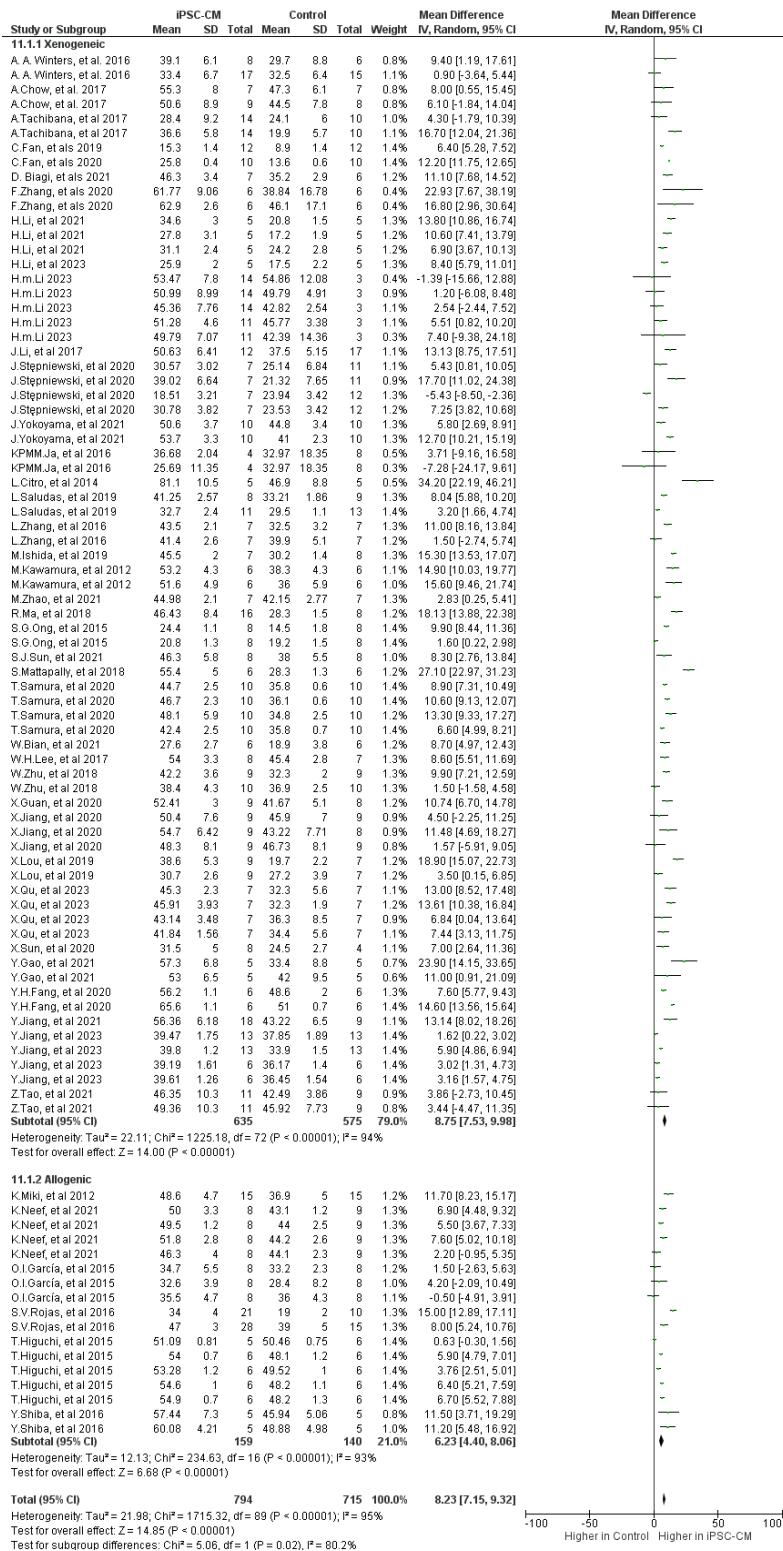

**Figure S6.** Cell-based effect on animal ejection fraction by origin of cell

|                            | Random sequence generation (selection bias) | Baseline characteristics (selection bias) | Allocation concealment (selection bias) | Random housing (Performance bias) | Blinding of participants and personnel (performance bias) | Blinding of outcome assessment (detection bias) | Blinding (Detection bias) | Incomplete outcome data (attrition bias) | Selective reporting (reporting bias) | Other bias |
|----------------------------|---------------------------------------------|-------------------------------------------|-----------------------------------------|-----------------------------------|-----------------------------------------------------------|-------------------------------------------------|---------------------------|------------------------------------------|--------------------------------------|------------|
| A. A. Winters, et al. 2016 | ?                                           | ?                                         | ?                                       | ?                                 | ?                                                         | ?                                               | ?                         | ?                                        | ?                                    | ?          |
| A. Chow, et al. 2017       | ?                                           | ?                                         | ?                                       | ?                                 | ?                                                         | ?                                               | ?                         | ?                                        | ?                                    | ?          |
| A.Tachibana, et al 2017    | ?                                           | ?                                         | ?                                       | ?                                 | ?                                                         | ?                                               | ?                         | ?                                        | ?                                    | ?          |
| C. Fan, et als 2019        | ?                                           | ?                                         | ?                                       | ?                                 | ?                                                         | ?                                               | ?                         | ?                                        | ?                                    | ?          |
| C. Fan, et als 2020        | ?                                           | ?                                         | ?                                       | ?                                 | ?                                                         | ?                                               | ?                         | ?                                        | ?                                    | ?          |
| C.V.Bibra, et al 2022      | ?                                           | ?                                         | ?                                       | ?                                 | ?                                                         | ?                                               | ?                         | ?                                        | ?                                    | ?          |
| D. Biagi, et als 2021      | ?                                           | ?                                         | ?                                       | ?                                 | ?                                                         | ?                                               | ?                         | ?                                        | ?                                    | ?          |
| E. Querde 2021             | ?                                           | ?                                         | ?                                       | ?                                 | ?                                                         | ?                                               | ?                         | ?                                        | ?                                    | ?          |
| F. Munarin, et al 2021     | ?                                           | ?                                         | ?                                       | ?                                 | ?                                                         | ?                                               | ?                         | ?                                        | ?                                    | ?          |
| F.Zhang, et als 2020       | ?                                           | ?                                         | ?                                       | ?                                 | ?                                                         | ?                                               | ?                         | ?                                        | ?                                    | ?          |
| H.Li, et al 2021           | ?                                           | ?                                         | ?                                       | ?                                 | ?                                                         | ?                                               | ?                         | ?                                        | ?                                    | ?          |
| H.Li, et al 2023           | ?                                           | ?                                         | ?                                       | ?                                 | ?                                                         | ?                                               | ?                         | ?                                        | ?                                    | ?          |
| H.m.Li 2023                | ?                                           | ?                                         | ?                                       | ?                                 | ?                                                         | ?                                               | ?                         | ?                                        | ?                                    | ?          |
| J.Li, et al 2017           | ?                                           | ?                                         | ?                                       | ?                                 | ?                                                         | ?                                               | ?                         | ?                                        | ?                                    | ?          |
| J.Śtepiński, et al 2020    | ?                                           | ?                                         | ?                                       | ?                                 | ?                                                         | ?                                               | ?                         | ?                                        | ?                                    | ?          |
| J.Yokoyama, et al 2021     | ?                                           | ?                                         | ?                                       | ?                                 | ?                                                         | ?                                               | ?                         | ?                                        | ?                                    | ?          |
| K.Miki, et al 2012         | ?                                           | ?                                         | ?                                       | ?                                 | ?                                                         | ?                                               | ?                         | ?                                        | ?                                    | ?          |
| K.Neef, et al 2021         | ?                                           | ?                                         | ?                                       | ?                                 | ?                                                         | ?                                               | ?                         | ?                                        | ?                                    | ?          |
| KPMM.Ja, et al 2016        | ?                                           | ?                                         | ?                                       | ?                                 | ?                                                         | ?                                               | ?                         | ?                                        | ?                                    | ?          |
| L.Citro, et al 2014        | ?                                           | ?                                         | ?                                       | ?                                 | ?                                                         | ?                                               | ?                         | ?                                        | ?                                    | ?          |
| L.Saludas, et al 2019      | ?                                           | ?                                         | ?                                       | ?                                 | ?                                                         | ?                                               | ?                         | ?                                        | ?                                    | ?          |
| L.Zhang, et al 2016        | ?                                           | ?                                         | ?                                       | ?                                 | ?                                                         | ?                                               | ?                         | ?                                        | ?                                    | ?          |
| M.Ishida, et al 2019       | ?                                           | ?                                         | ?                                       | ?                                 | ?                                                         | ?                                               | ?                         | ?                                        | ?                                    | ?          |
| M.Kawamura, et al 2012     | ?                                           | ?                                         | ?                                       | ?                                 | ?                                                         | ?                                               | ?                         | ?                                        | ?                                    | ?          |
| M.Zhao, et al 2021         | ?                                           | ?                                         | ?                                       | ?                                 | ?                                                         | ?                                               | ?                         | ?                                        | ?                                    | ?          |
| O.I.García, et al 2015     | ?                                           | ?                                         | ?                                       | ?                                 | ?                                                         | ?                                               | ?                         | ?                                        | ?                                    | ?          |
| R.J.Jabbour, et al 2021    | ?                                           | ?                                         | ?                                       | ?                                 | ?                                                         | ?                                               | ?                         | ?                                        | ?                                    | ?          |
| R.Ma, et al 2018           | ?                                           | ?                                         | ?                                       | ?                                 | ?                                                         | ?                                               | ?                         | ?                                        | ?                                    | ?          |
| S.Funakoshi, et al 2015    | ?                                           | ?                                         | ?                                       | ?                                 | ?                                                         | ?                                               | ?                         | ?                                        | ?                                    | ?          |
| S.G.Ong, et al 2015        | ?                                           | ?                                         | ?                                       | ?                                 | ?                                                         | ?                                               | ?                         | ?                                        | ?                                    | ?          |
| S.J.Park, et al 2019       | ?                                           | ?                                         | ?                                       | ?                                 | ?                                                         | ?                                               | ?                         | ?                                        | ?                                    | ?          |
| S.J.Sun, et al 2021        | ?                                           | ?                                         | ?                                       | ?                                 | ?                                                         | ?                                               | ?                         | ?                                        | ?                                    | ?          |
| S.Mattapally, et al 2018   | ?                                           | ?                                         | ?                                       | ?                                 | ?                                                         | ?                                               | ?                         | ?                                        | ?                                    | ?          |
| S.V.Rojas, et al 2016      | ?                                           | ?                                         | ?                                       | ?                                 | ?                                                         | ?                                               | ?                         | ?                                        | ?                                    | ?          |
| T.Higuchi, et al 2015      | ?                                           | ?                                         | ?                                       | ?                                 | ?                                                         | ?                                               | ?                         | ?                                        | ?                                    | ?          |
| T.Samura, et al 2020       | ?                                           | ?                                         | ?                                       | ?                                 | ?                                                         | ?                                               | ?                         | ?                                        | ?                                    | ?          |
| W.Bian, et al 2021         | ?                                           | ?                                         | ?                                       | ?                                 | ?                                                         | ?                                               | ?                         | ?                                        | ?                                    | ?          |
| W.H.Lee, et al 2017        | ?                                           | ?                                         | ?                                       | ?                                 | ?                                                         | ?                                               | ?                         | ?                                        | ?                                    | ?          |
| W.Zhu, et al 2018          | ?                                           | ?                                         | ?                                       | ?                                 | ?                                                         | ?                                               | ?                         | ?                                        | ?                                    | ?          |
| X.Guan, et al 2020         | ?                                           | ?                                         | ?                                       | ?                                 | ?                                                         | ?                                               | ?                         | ?                                        | ?                                    | ?          |
| X.Jiang, et al 2020        | ?                                           | ?                                         | ?                                       | ?                                 | ?                                                         | ?                                               | ?                         | ?                                        | ?                                    | ?          |
| X.Lou, et al 2019          | ?                                           | ?                                         | ?                                       | ?                                 | ?                                                         | ?                                               | ?                         | ?                                        | ?                                    | ?          |
| X.Qu, et al 2023           | ?                                           | ?                                         | ?                                       | ?                                 | ?                                                         | ?                                               | ?                         | ?                                        | ?                                    | ?          |
| X.Sun, et al 2020          | ?                                           | ?                                         | ?                                       | ?                                 | ?                                                         | ?                                               | ?                         | ?                                        | ?                                    | ?          |
| X.Wang, et al 2015         | ?                                           | ?                                         | ?                                       | ?                                 | ?                                                         | ?                                               | ?                         | ?                                        | ?                                    | ?          |
| X.Zhao, et al 2018         | ?                                           | ?                                         | ?                                       | ?                                 | ?                                                         | ?                                               | ?                         | ?                                        | ?                                    | ?          |
| Y.Gao, et al 2021          | ?                                           | ?                                         | ?                                       | ?                                 | ?                                                         | ?                                               | ?                         | ?                                        | ?                                    | ?          |
| Y.H.Fang, et al 2020       | ?                                           | ?                                         | ?                                       | ?                                 | ?                                                         | ?                                               | ?                         | ?                                        | ?                                    | ?          |
| Y.Jiang, et al 2021        | ?                                           | ?                                         | ?                                       | ?                                 | ?                                                         | ?                                               | ?                         | ?                                        | ?                                    | ?          |
| Y.Jiang, et al 2023        | ?                                           | ?                                         | ?                                       | ?                                 | ?                                                         | ?                                               | ?                         | ?                                        | ?                                    | ?          |
| Y.Shiba, et al 2016        | ?                                           | ?                                         | ?                                       | ?                                 | ?                                                         | ?                                               | ?                         | ?                                        | ?                                    | ?          |
| Z.Tao, et al 2021          | ?                                           | ?                                         | ?                                       | ?                                 | ?                                                         | ?                                               | ?                         | ?                                        | ?                                    | ?          |

**Figure S7.** SYRCLE risk of bias. Yellow is unclear risk, green is low risk



**Table S1.** General information of included studies

| Author<br>(year)             | Animal characteristics |             |                        |                                | Intervention characteristics    |            |                                       |                   | Outcome measures         |                              |
|------------------------------|------------------------|-------------|------------------------|--------------------------------|---------------------------------|------------|---------------------------------------|-------------------|--------------------------|------------------------------|
|                              | Species                | Age         | Method of IHD induced  | Immunosuppression              | Type of treatment               | Total dose | Time of treatment (after IHD-induced) | Control treatment | Time of assessment       | Method of cardiac assessment |
| <b>Small animal research</b> |                        |             |                        |                                |                                 |            |                                       |                   |                          |                              |
| Atsushi [1]<br>(2017)        | SCID mice              | 90-120 days | permanent LAD ligation | Genetic immunodeficient animal | intramyocardial cell injections | 500000     | immediately                           | PBS               | 2 weeks and 4 weeks      | MRI                          |
| Amalia [2]<br>(2016)         | SCID mice              | 12 weeks    | permanent LAD ligation | Genetic immunodeficient animal | intramyocardial cell injections | 500000     | immediately                           | Saline            | 4 weeks, 12 weeks        | Echo                         |
| Chow [3]<br>(2017)           | nut rat                | 8 weeks     | permanent LAD ligation | NR                             | intramyocardial cell injections | 500000     | 10 minutes after                      | PBS               | 48 hours, 10 weeks       | MRI                          |
| Diogo [4]<br>(2021)          | Wistar rats            | 8 weeks     | permanent LAD ligation | Cyclosporine                   | intramyocardial cell injections | 10000000   | 1 week after                          | free solution     | 30 days                  | Echo                         |
| Fan [5]<br>(2019)            | NOD/SCID Gamma mice    | NR          | permanent LAD ligation | Genetic immunodeficient animal | intramyocardial cell injections | 300000     | immediately                           | PBS               | 6 months                 | Echo                         |
| Fan [6]<br>(2020)            | mice                   | NR          | permanent LAD ligation | Genetic immunodeficient animal | bio-engineered tissue treatment | 1000000    | immediately                           | free patch        | 4 weeks                  | Echo                         |
| Fabiola [7]<br>(2021)        | Sprague Dawley rat     | 8-12 weeks  | I/R                    | athymic                        | bio-engineered tissue treatment | 10000000   | 4 days after                          | no treatment      | 1 week, 4 weeks          | Echo                         |
| Fengzhi [8]<br>(2021)        | Sprague–Dawley rats    | NR          | permanent LAD ligation | NR                             | intramyocardial cell injections | 8000000    | 10 minutes after                      | PBS               | 3 days, 4 weeks          | Echo                         |
| Hekai [9]<br>(2021)          | C57BL/6 mice           | 6-8 weeks   | permanent LAD ligation | Genetic immunodeficient animal | intramyocardial cell injections | 200000     | immediately                           | PBS               | 1 week, 2 weeks, 4 weeks | Echo                         |

|                        |                                       |                |                                |                                   |                                    |         |                     |                  |                                      |      |
|------------------------|---------------------------------------|----------------|--------------------------------|-----------------------------------|------------------------------------|---------|---------------------|------------------|--------------------------------------|------|
| Hekai [10]<br>(2023)   | C57BL/6 mice                          | 6-8<br>weeks   | permanent LAD<br>ligation      | Genetic<br>immunodeficient animal | intramyocardial<br>cell injections | 200000  | immediately         | PBS              | 4 weeks                              | Echo |
| Jacek [11]<br>(2020)   | Foxn1nu mice                          | 6-8<br>weeks   | permanent LAD<br>ligation      | athymic                           | intramyocardial<br>cell injections | 500000  | immediately         | Saline           | 1 week, 2 weeks, 4<br>weeks, 6 weeks | Echo |
| Junjun [12]<br>(2017)  | nude rats                             | 8<br>weeks     | permanent LAD<br>ligation      | no report                         | bio-engineered<br>tissue treatment | 7000000 | immediately         | free patch       | 4 weeks                              | Echo |
| Junya [13]<br>(2021)   | F344/NJcl-rnu/rnu<br>rats             | NR             | permanent LAD<br>ligation      | Genetic<br>immunodeficient animal | bio-engineered<br>tissue treatment | 3000000 | 2 weeks<br>after    | free patch       | 4 weeks, 12 weeks                    | Echo |
| Kenji [14]<br>(2012)   | F344/NJcl-rnu/rnu<br>rats             | NR             | permanent LAD<br>ligation      | Genetic<br>immunodeficient animal | bio-engineered<br>tissue treatment | NR      | 2 weeks<br>after    | no<br>treatment  | 1 week, 2 weeks, 4<br>weeks          | Echo |
| Klaus [15]<br>(2021)   | C57BL/6 mice                          | 8-10<br>weeks  | cryo-infarction                | Genetic<br>immunodeficient animal | intramyocardial<br>cell injections | 500000  | immediately         | PBS              | 1 week, 2 weeks, 3<br>weeks, 4 weeks | MRI  |
| KP My [16]<br>(2015)   | SCID mice                             | 10-12<br>weeks | permanent LAD<br>ligation      | Genetic<br>immunodeficient animal | intramyocardial<br>cell injections | 200000  | immediately         | PBS              | 2 weeks, 4 weeks                     | Echo |
| Laura [17]<br>(2019)   | BALB/C (Rag-2)<br>mice                | 8-12<br>weeks  | permanent LAD<br>ligation      | Genetic<br>immunodeficient animal | intramyocardial<br>cell injections | 150000  | 15 minutes<br>after | free<br>solution | 7 days, 60 days                      | Echo |
| Liyang [18]<br>(2015)  | NOD/SCID/ $\gamma$ c-/-<br>(NSG) mice | 12<br>weeks    | permanent LAD<br>ligation      | Genetic<br>immunodeficient animal | bio-engineered<br>tissue treatment | 600000  | immediately         | free<br>solution | 1 week, 4 weeks                      | Echo |
| Lucas [19]<br>(2014)   | nude rats                             | NR             | permanent LAD<br>ligation      | athymic                           | intramyocardial<br>injections      | 1000000 | immediately         | free<br>solution | 4 weeks                              | Echo |
| Olalla [20]<br>(2015)  | DBA/2J mice                           | 8<br>weeks     | permanent<br>coronary ligation | Genetic<br>immunodeficient animal | intramyocardial<br>injections      | 200000  | 15 minutes<br>after | PBS              | 3 days, 60 days                      | Echo |
| Ruilian [21]<br>(2018) | SCID mice                             | 10-12<br>weeks | permanent<br>coronary ligation | Genetic<br>immunodeficient animal | intramyocardial<br>cell injections | 200000  | immediately         | PBS              | 4 weeks                              | Echo |
| Saidulu [22]<br>(2018) | NOD/SCID<br>Gamma mice                | NR             | permanent LAD<br>ligation      | Genetic<br>immunodeficient animal | bio-engineered<br>tissue treatment | 200000  | immediately         | no<br>treatment  | 4 weeks                              | Echo |

|                          |                           |                |                           |                                   |                                    |          |                  |                 |                                                           |      |
|--------------------------|---------------------------|----------------|---------------------------|-----------------------------------|------------------------------------|----------|------------------|-----------------|-----------------------------------------------------------|------|
| Sang-Ging [23]<br>(2015) | NOD/SCID mice             | NR             | permanent LAD<br>ligation | Genetic<br>immunodeficient animal | intramyocardial<br>cell injections | 2000000  | immediately      | Saline          | 7 days, 35 days                                           | MRI  |
| Sebastian [24]<br>(2017) | SCID beige mice           | NR             | permanent LAD<br>ligation | Genetic<br>immunodeficient animal | intramyocardial<br>cell injections | 1500000  | immediately      | PBS             | 3 days, 7 days, 14<br>days, 21 days, 28<br>days           | MRI  |
| Shunsuke [25]<br>(2015)  | NOG mice                  | NR             | permanent LAD<br>ligation | Genetic<br>immunodeficient animal | intramyocardial<br>cell injections | 1000000  | immediately      | PBS             | 1 week, 2 weeks, 3<br>weeks, 4 weeks, 6<br>weeks, 8 weeks | Echo |
| Si-Jia [26]<br>(2021)    | ICR mice                  | 12-16<br>weeks | permanent LAD<br>ligation | Genetic<br>immunodeficient animal | intramyocardial<br>cell injections | 1000000  | immediately      | PBS             | 4wks                                                      | Echo |
| Soon-Jung [27]<br>(2019) | Fischer 344 rat           | 8-10<br>weeks  | permanent LAD<br>ligation | Genetic<br>immunodeficient animal | intramyocardial<br>cell injections | 1000000  | 7 days after     | no<br>treatment | 2 weeks, 4 weeks,<br>8 weeks                              | Echo |
| Takaaki [28]<br>(2020)   | nude rat                  | 8<br>weeks     | permanent LAD<br>ligation | athymic                           | bio-engineered<br>tissue treatment | 5000000  | immediately      | free sheet      | 1 week, 2 weeks, 3<br>weeks, 4 weeks                      | Echo |
| Takahiro [29]<br>(2015)  | F344/NJcl-rnu/rnu<br>rats | 6<br>weeks     | permanent LAD<br>ligation | Genetic<br>immunodeficient animal | bio-engineered<br>tissue treatment | NR       | 2 weeks<br>after | no<br>treatment | 7 days, 14 days                                           | Echo |
| Weihua [30]<br>(2021)    | NOD/SCID<br>Gamma mice    | NR             | permanent LAD<br>ligation | Genetic<br>immunodeficient animal | intramyocardial<br>cell injections | 300000   | immediately      | PBS             | 4 weeks                                                   | Echo |
| Won [31]<br>(2017)       | nude rat                  | NR             | permanent LAD<br>ligation | athymic                           | intramyocardial<br>cell injections | 10000000 | 4 days after     | PBS             | 30 days                                                   | MRI  |
| Wuqiang [32]<br>(2018)   | NOD/SCID<br>Gamma mice    | NR             | permanent LAD<br>ligation | Genetic<br>immunodeficient animal | intramyocardial<br>cell injections | 300000   | immediately      | PBS             | 1 week, 4 weeks                                           | Echo |
| Xi [33]<br>(2019)        | NOD/ SCID<br>gamma mic    | 8-10w          | permanent LAD<br>ligation | Genetic<br>immunodeficient animal | intramyocardial<br>cell injections | 300000   | immediately      | no<br>treatment | 1 week, 4 weeks                                           | Echo |
| Xiang [34]<br>(2023)     | NJcl-rnu/rnu nude<br>rat  | 7w             | permanent LAD<br>ligation | Genetic<br>immunodeficient animal | bio-engineered<br>tissue treatment | 5000000  | 2 weeks<br>after | no<br>treatment | 1 week, 2 weeks, 3<br>weeks, 4 weeks                      | Echo |

|                              |                    |             |                        |                                  |                                                                          |                             |                  |                  |                                   |      |
|------------------------------|--------------------|-------------|------------------------|----------------------------------|--------------------------------------------------------------------------|-----------------------------|------------------|------------------|-----------------------------------|------|
| Xin Jiang [35]<br>(2020)     | ICR mice           | 12-16w      | permanent LAD ligation | Genetic immunodeficient animal   | intramyocardial cell injections                                          | 400000                      | 10 minutes after | free solution    | 1 week, 2 weeks, 4 weeks          | Echo |
| Xintong [36]<br>(2015)       | nude rats          | NR          | permanent LAD ligation | NR                               | intramyocardial cell injections                                          | 3000000                     | 30 minutes after | PBS              | 2 weeks                           | Echo |
| Xuetao [37]<br>(2020)        | rnu/rnu rat        | 7-8 weeks   | permanent LAD ligation | athymic                          | intramyocardial cell injections                                          | 10000000                    | 2 weeks after    | no treatment     | 4 weeks                           | Echo |
| Xumin [38]<br>(2020)         | Sprague Dawley rat | 8 weeks     | permanent LAD ligation | methylprednisolone               | intramyocardial cell injections                                          | 10000000                    | 10 days after    | Albumin solution | 4 weeks                           | Echo |
| Yi-Hsien [39]<br>(2020)      | Sprague Dawley rat | 12 weeks    | temporary LAD ligation | cyclosporine                     | intramyocardial cell injections                                          | 10000000                    | 4 days after     | free solution    | 4 weeks                           | Echo |
| Yu Jiang [40]<br>(2021)      | Sprague Dawley rat | NR          | permanent LAD ligation | NR                               | 1. intramyocardial cell injections<br>2. bio-engineered tissue treatment | 1000000                     | immediately      | Saline           | 4 weeks                           | Echo |
| Yuanxue [41]<br>(2021)       | Sprague–Dawley rat | NR          | permanent LAD ligation | no report                        | intramyocardial cell injections                                          | 10000000                    | immediately      | PBS              | 1 week, 5 weeks                   | Echo |
| Yun [42]<br>(2023)           | C57BL/6J mice      | 11-12 weeks | permanent LAD ligation | no report                        | bio-engineered tissue treatment                                          | 200000                      | 7 days after     | free solution    | 7 days, 28 days, 60 days, 90 days | Echo |
| Zhonghao [43]<br>(2020)      | Wistar rat         | 12 weeks    | permanent LAD ligation | cyclosporine                     | bio-engineered tissue treatment                                          | 1000000                     | 10 minutes after | free solution    | 6 weeks                           | Echo |
| <b>Large animal research</b> |                    |             |                        |                                  |                                                                          |                             |                  |                  |                                   |      |
| Constantin [44]<br>(2022)    | guinea pigs        | NR          | cryo-infarction        | cyclosporine, methylprednisolone | bio-engineered tissue treatment                                          | 15000000                    | 4 weeks after    | free patch       | 4 weeks                           | Echo |
| Eva [45]<br>(2021)           | guinea pigs        | 8-9 weeks   | cryo-infarction        | cyclosporine, methylprednisolone | bio-engineered tissue treatment                                          | 9000000, 12000000, 15000000 | 7 days after     | free patch       | 4ws                               | Echo |

|                         |                                   |                |                                |                                                             |                                                                               |                                           |                     |                  |                                                            |                     |
|-------------------------|-----------------------------------|----------------|--------------------------------|-------------------------------------------------------------|-------------------------------------------------------------------------------|-------------------------------------------|---------------------|------------------|------------------------------------------------------------|---------------------|
| Hong-mei [46]<br>(2023) | primate                           | 4-6y<br>years  | I/R                            | methylprednisolone,<br>mycophenolate mofetil,<br>tacrolimus | 1. intravenous,<br>2. intramyocardial<br>3. intracoronary<br>cell injections, | 100000000/<br>kg,<br>100000<br>(coronary) | 24 hours<br>after   | no<br>treatment  | 1 week, 2 weeks, 4<br>weeks, 6 weeks ,8<br>weeks, 12 weeks | Echo                |
| Masashi [47]<br>(2011)  | minipig                           | NR             | permanent LAD<br>ligation      | tacrolimus                                                  | bio-engineered<br>tissue treatment                                            | 25000000                                  | 1 month<br>after    | no<br>treatment  | 4 weeks, 8 weeks                                           | Echo and<br>CT scan |
| Masaru [48]<br>(2019)   | CLAWN<br>miniature porcine        | 6-10<br>months | permanent LAD<br>ligation      | tacrolimus,<br>mycophenolate mofetil,<br>corticosteroids    | bio-engineered<br>tissue treatment                                            | 100000000                                 | 1 month<br>after    | no<br>treatment  | 8                                                          | Echo and<br>MRI     |
| Meng [49]<br>(2021)     | Yorkshire pig                     | NR             | I/R                            | no report                                                   | intramyocardial<br>cell injections                                            | 60000000                                  | 60 minutes<br>after | PBS              | 4 weeks                                                    | MRI                 |
| Richard [50]<br>(2021)  | New Zealand<br>white rabbit       | NR             | permanent<br>coronary ligation | ciclosporin,<br>methylprednisolone                          | bio-engineered<br>tissue treatment                                            | 17500000                                  | immediately         | free patch       | 1 week, 2 weeks, 4<br>weeks                                | Echo                |
| Yuji [51]<br>(2016)     | Filipino<br>cynomolgus<br>monkeys | 4-5<br>years   | I/R                            | methylprednisolone,<br>tacrolimus                           | intramyocardial<br>cell injections                                            | 400000000                                 | 2 weeks<br>after    | free<br>solution | 4wks, 12wks                                                | Echo                |

NR: not report

I/R: ischemia/reperfusion therapy

### List of included research

1. Tachibana, A., et al., *Paracrine Effects of the Pluripotent Stem Cell-Derived Cardiac Myocytes Salvage the Injured Myocardium*. Circ Res, 2017. **121**(6): p. e22-e36.
2. Winters, A.A., et al., *Evaluation of Multiple Biological Therapies for Ischemic Cardiac Disease*. Cell Transplant, 2016. **25**(9): p. 1591-1607.
3. Chow, A., et al., *Human Induced Pluripotent Stem Cell-Derived Cardiomyocyte Encapsulating Bioactive Hydrogels Improve Rat Heart Function Post Myocardial Infarction*. Stem Cell Reports, 2017. **9**(5): p. 1415-1422.
4. Biagi, D., et al., *In Situ Maturated Early-Stage Human-Induced Pluripotent Stem Cell-Derived Cardiomyocytes Improve Cardiac Function by Enhancing Segmental Contraction in Infarcted Rats*. J Pers Med, 2021. **11**(5).
5. Fan, C., et al., *Cardiomyocytes from CCND2-overexpressing human induced-pluripotent stem cells repopulate the myocardial scar in mice: A 6-month study*. J Mol Cell Cardiol, 2019. **137**: p. 25-33.
6. Fan, C., et al., *CHIR99021 and fibroblast growth factor 1 enhance the regenerative potency of human cardiac muscle patch after myocardial infarction in mice*. J Mol Cell Cardiol, 2020. **141**: p. 1-10.
7. Munarin, F., et al., *Engineered human myocardium with local release of angiogenic proteins improves vascularization and cardiac function in injured rat hearts*. Biomaterials, 2020. **251**: p. 120033.
8. Zhang, F., et al., *Transferrin improved the generation of cardiomyocyte from human pluripotent stem cells for myocardial infarction repair*. J Mol Histol, 2021. **52**(1): p. 87-99.
9. Li, H., et al., *Injectable AuNP-HA matrix with localized stiffness enhances the formation of gap junction in engrafted human induced pluripotent stem cell-derived cardiomyocytes and promotes cardiac repair*. Biomaterials, 2021. **279**: p. 121231.
10. Li, H., et al., *Supramolecular Assemblies of Glycopeptides Enhance Gap Junction Maturation of Human Induced Pluripotent Stem Cell-Derived Cardiomyocytes via Inducing Spheroids Formation to Optimize Cardiac Repair*. Adv Healthc Mater, 2023. **12**(25): p. e2300696.
11. Stepniewski, J., et al., *Human Induced Pluripotent Stem Cell-Derived Cardiomyocytes, in Contrast to Adipose Tissue-Derived Stromal Cells, Efficiently Improve Heart Function in Murine Model of Myocardial Infarction*. Biomedicines, 2020. **8**(12).
12. Li, J., et al., *Human Pluripotent Stem Cell-Derived Cardiac Tissue-like Constructs for Repairing the Infarcted Myocardium*. Stem Cell Reports, 2017. **9**(5): p. 1546-1559.
13. Yokoyama, J., et al., *Human induced pluripotent stem cell-derived three-dimensional cardiomyocyte tissues ameliorate the rat ischemic myocardium by remodeling the extracellular matrix and cardiac protein phenotype*. PLoS One, 2021. **16**(3): p. e0245571.
14. Miki, K., et al., *Bioengineered myocardium derived from induced pluripotent stem cells improves cardiac function and attenuates cardiac remodeling following chronic myocardial infarction in rats*. Stem Cells Transl Med, 2012. **1**(5): p. 430-7.

15. Neef, K., et al., *Co-transplantation of Mesenchymal Stromal Cells and Induced Pluripotent Stem Cell-Derived Cardiomyocytes Improves Cardiac Function After Myocardial Damage*. Front Cardiovasc Med, 2021. **8**: p. 794690.
16. Ja, K.P., et al., *iPSC-derived human cardiac progenitor cells improve ventricular remodelling via angiogenesis and interstitial networking of infarcted myocardium*. J Cell Mol Med, 2016. **20**(2): p. 323-32.
17. Saludas, L., et al., *Long-Term Engraftment of Human Cardiomyocytes Combined with Biodegradable Microparticles Induces Heart Repair*. J Pharmacol Exp Ther, 2019. **370**(3): p. 761-771.
18. Zhang, L., et al., *Derivation and high engraftment of patient-specific cardiomyocyte sheet using induced pluripotent stem cells generated from adult cardiac fibroblast*. Circ Heart Fail, 2015. **8**(1): p. 156-66.
19. Citro, L., et al., *Comparison of human induced pluripotent stem-cell derived cardiomyocytes with human mesenchymal stem cells following acute myocardial infarction*. PLoS One, 2014. **9**(12): p. e116281.
20. Iglesias-García, O., et al., *Neuregulin-1 $\beta$  induces mature ventricular cardiac differentiation from induced pluripotent stem cells contributing to cardiac tissue repair*. Stem Cells Dev, 2015. **24**(4): p. 484-96.
21. Ma, R., et al., *Electrical Stimulation Enhances Cardiac Differentiation of Human Induced Pluripotent Stem Cells for Myocardial Infarction Therapy*. Antioxid Redox Signal, 2018. **28**(5): p. 371-384.
22. Mattapally, S., et al., *Spheroids of cardiomyocytes derived from human-induced pluripotent stem cells improve recovery from myocardial injury in mice*. Am J Physiol Heart Circ Physiol, 2018. **315**(2): p. H327-h339.
23. Ong, S.G., et al., *Microfluidic Single-Cell Analysis of Transplanted Human Induced Pluripotent Stem Cell-Derived Cardiomyocytes After Acute Myocardial Infarction*. Circulation, 2015. **132**(8): p. 762-771.
24. Rojas, S.V., et al., *Transplantation of purified iPSC-derived cardiomyocytes in myocardial infarction*. PLoS One, 2017. **12**(5): p. e0173222.
25. Funakoshi, S., et al., *Enhanced engraftment, proliferation and therapeutic potential in heart using optimized human iPSC-derived cardiomyocytes*. Scientific Reports, 2016. **6**(1): p. 19111.
26. Sun, S.J., et al., *Immunomodulation by systemic administration of human-induced pluripotent stem cell-derived mesenchymal stromal cells to enhance the therapeutic efficacy of cell-based therapy for treatment of myocardial infarction*. Theranostics, 2021. **11**(4): p. 1641-1654.
27. Park, S.-J., et al., *Dual stem cell therapy synergistically improves cardiac function and vascular regeneration following myocardial infarction*. Nature Communications, 2019. **10**(1): p. 3123.
28. Samura, T., et al., *Laminin-221 Enhances Therapeutic Effects of Human-Induced Pluripotent Stem Cell-Derived 3-Dimensional Engineered Cardiac Tissue Transplantation in a Rat Ischemic Cardiomyopathy Model*. J Am Heart Assoc, 2020. **9**(16): p. e015841.
29. Higuchi, T., et al., *Functional and Electrical Integration of Induced Pluripotent Stem Cell-Derived Cardiomyocytes in a Myocardial Infarction Rat Heart*. Cell Transplant, 2015. **24**(12): p. 2479-89.

30. Bian, W., et al., *miR-199a Overexpression Enhances the Potency of Human Induced-Pluripotent Stem-Cell-Derived Cardiomyocytes for Myocardial Repair*. Front Pharmacol, 2021. **12**: p. 673621.
31. Lee, W.H., et al., *Comparison of Non-Coding RNAs in Exosomes and Functional Efficacy of Human Embryonic Stem Cell- versus Induced Pluripotent Stem Cell-Derived Cardiomyocytes*. Stem Cells, 2017. **35**(10): p. 2138-2149.
32. Zhu, W., et al., *CCND2 Overexpression Enhances the Regenerative Potency of Human Induced Pluripotent Stem Cell-Derived Cardiomyocytes: Remuscularization of Injured Ventricle*. Circ Res, 2018. **122**(1): p. 88-96.
33. Lou, X., et al., *N-cadherin overexpression enhances the reparative potency of human-induced pluripotent stem cell-derived cardiac myocytes in infarcted mouse hearts*. Cardiovasc Res, 2020. **116**(3): p. 671-685.
34. Qu, X., et al., *ONO-1301 enhances post-transplantation survival of human induced pluripotent stem cell-derived cardiac tissue sheet by promoting angiogenesis*. J Heart Lung Transplant, 2023. **42**(6): p. 716-729.
35. Jiang, X., Z. Yang, and M. Dong, *Cardiac repair in a murine model of myocardial infarction with human induced pluripotent stem cell-derived cardiomyocytes*. Stem Cell Res Ther, 2020. **11**(1): p. 297.
36. Wang, X., et al., *A temperature-sensitive, self-adhesive hydrogel to deliver iPSC-derived cardiomyocytes for heart repair*. Int J Cardiol, 2015. **190**: p. 177-80.
37. Sun, X., et al., *Transplanted microvessels improve pluripotent stem cell-derived cardiomyocyte engraftment and cardiac function after infarction in rats*. Sci Transl Med, 2020. **12**(562).
38. Guan, X., et al., *Transplantation of human induced pluripotent stem cell-derived cardiomyocytes improves myocardial function and reverses ventricular remodeling in infarcted rat hearts*. Stem Cell Res Ther, 2020. **11**(1): p. 73.
39. Fang, Y.H., et al., *Efficient Cardiac Differentiation of Human Amniotic Fluid-Derived Stem Cells into Induced Pluripotent Stem Cells and Their Potential Immune Privilege*. Int J Mol Sci, 2020. **21**(7).
40. Jiang, Y., et al., *Myocardial repair of bioengineered cardiac patches with decellularized placental scaffold and human-induced pluripotent stem cells in a rat model of myocardial infarction*. Stem Cell Res Ther, 2021. **12**(1): p. 13.
41. Gao, Y., et al., *CRISPR/Cas9-edited triple-fusion reporter gene imaging of dynamics and function of transplanted human urinary-induced pluripotent stem cell-derived cardiomyocytes*. Eur J Nucl Med Mol Imaging, 2021. **48**(3): p. 708-720.
42. Jiang, Y., et al., *Dual human iPSC-derived cardiac lineage cell-seeding extracellular matrix patches promote regeneration and long-term repair of infarcted hearts*. Bioact Mater, 2023. **28**: p. 206-226.
43. Tao, Z., et al., *Angiopoietin-1 enhanced myocyte mitosis, engraftment, and the reparability of hiPSC-CMs for treatment of myocardial infarction*. Cardiovasc Res, 2021. **117**(6): p. 1578-1591.
44. von Bibra, C., et al., *Human engineered heart tissue transplantation in a guinea pig chronic injury model*. J Mol Cell Cardiol, 2022. **166**: p. 1-10.
45. Querdel, E., et al., *Human Engineered Heart Tissue Patches Remuscularize the Injured Heart in a Dose-Dependent Manner*. Circulation, 2021. **143**(20): p. 1991-2006.



46. Li, H.M., et al., *Optimal transplantation strategy using human induced pluripotent stem cell-derived cardiomyocytes for acute myocardial infarction in nonhuman primates*. MedComm (2020), 2023. **4**(3): p. e289.
47. Kawamura, M., et al., *Feasibility, safety, and therapeutic efficacy of human induced pluripotent stem cell-derived cardiomyocyte sheets in a porcine ischemic cardiomyopathy model*. Circulation, 2012. **126**(11 Suppl 1): p. S29-37.
48. Ishida, M., et al., *Transplantation of Human-induced Pluripotent Stem Cell-derived Cardiomyocytes Is Superior to Somatic Stem Cell Therapy for Restoring Cardiac Function and Oxygen Consumption in a Porcine Model of Myocardial Infarction*. Transplantation, 2019. **103**(2): p. 291-298.
49. Zhao, M., et al., *Cyclin D2 Overexpression Enhances the Efficacy of Human Induced Pluripotent Stem Cell-Derived Cardiomyocytes for Myocardial Repair in a Swine Model of Myocardial Infarction*. Circulation, 2021. **144**(3): p. 210-228.
50. Jabbour, R.J., et al., *In vivo grafting of large engineered heart tissue patches for cardiac repair*. JCI Insight, 2021. **6**(15).
51. Shiba, Y., et al., *Allogeneic transplantation of iPS cell-derived cardiomyocytes regenerates primate hearts*. Nature, 2016. **538**(7625): p. 388-391.

**Table S2.** Meta-regression of potential modifiers of FS

| Variable                         | Coefficient | SE   | t-value | P-value | 95% Confidence Interval |
|----------------------------------|-------------|------|---------|---------|-------------------------|
| Animal size -small               | 14.11       | 3.32 | 4.25    | 0.00    | 7.45 to 20.78           |
| Treatment timing: chronic        | 13.36       | 5.45 | 2.45    | 0.02    | 2.44 to 24.28           |
| Treatment timing: subacute       | -2.10       | 1.74 | -1.20   | 0.23    | -5.59 to 1.40           |
| Method delivery: Intracoronary   | -8.39       | 3.34 | -2.51   | 0.02    | -15.10 to -1.69         |
| Method delivery: Intramyocardial | -0.73       | 1.51 | -0.48   | 0.63    | -3.76 to 2.31           |
| Method delivery: Intravenous     | -1.03       | 2.97 | -0.35   | 0.73    | -6.98 to 4.91           |
| Time of follow up: < 4w          | -1.87       | 1.09 | -1.72   | 0.09    | -4.06 to 0.31           |
| Time of follow up: > 8w          | -0.63       | 1.89 | -0.33   | 0.74    | -4.43 to 3.17           |
| Cell origin: Xenogeneic          | -4.63       | 2.96 | -1.57   | 0.12    | -10.57 to 1.30          |
| Disease model: Permanent injury  | -7.36       | 2.92 | -2.52   | 0.01    | -13.22 to -1.5          |

**Table S3.** Meta-regression of potential modifiers of LV fibrosis

| Variable                               | Coefficient | SE   | t-value | P-value     | 95% Confidence Interval |
|----------------------------------------|-------------|------|---------|-------------|-------------------------|
| Animal size: big                       | -1.64       | 2.31 | -0.71   | 0.48        | -6.31 to 3.01           |
| Animal size: small                     | 3.51        | 2.91 | 1.21    | 0.23        | -2.28 to 9.31           |
| Treatment timing: acute                | -3.11       | 2.26 | -1.37   | 0.17        | -7.61 to 1.39           |
| Treatment timing: chronic              | 8.16        | 4.65 | 1.75    | 0.08        | -1.08 to 17.41          |
| Treatment timing: sub-acute            | -3.19       | 2.21 | -1.44   | 0.15        | -7.59 to 1.21           |
| Method delivery: Bio-engineered tissue | 3.91        | 2.14 | 1.82    | 0.07        | -0.34 to 8.18           |
| Method delivery: Intracoronary         | -8.06       | 3.32 | -2.42   | <b>0.02</b> | -14.67 to -1.45         |
| Method delivery: Intramyocardial       | 3.82        | 1.64 | 2.33    | <b>0.02</b> | 0.56 to 7.08            |
| Method delivery: Intravenous           | 2.18        | 2.81 | 0.78    | 0.43        | -3.37 to 7.75           |
| Cell origin: Allogeneic                | -0.15       | 1.13 | -0.13   | 0.89        | -2.41 to 2.11           |
| Cell origin: Xenogeneic                | 2.01        | 0.92 | 2.18    | <b>0.03</b> | 0.18 to 3.84            |
| Disease model: IR                      | 1.96        | 2.61 | 0.74    | 0.45        | -3.24 to 7.16           |
| Disease model: Permanent injury        | -0.09       | 2.15 | -0.04   | 0.96        | -4.38 to 4.18           |
| Follow up: < 4 weeks                   | 1.01        | 1.29 | 0.77    | 0.43        | -1.57 to 3.59           |
| Follow up: 4-8 weeks                   | 1.05        | 1.26 | 0.82    | 0.41        | -1.47 to 3.57           |
| Follow up: > 8 weeks                   | -0.96       | 2.45 | -0.39   | 0.69        | -5.84 to 3.91           |

**Table S4.** Meta-regression of potential modifiers of LVESV

| Variable                         | Coefficient | SE    | t-value | P-value | 95% Confidence Interval |
|----------------------------------|-------------|-------|---------|---------|-------------------------|
| Treatment timing: sub-acute      | -100.48     | 69.60 | -1.44   | 0.169   | -248.83 to 47.87        |
| Method delivery: Intramyocardial | 34.21       | 20.06 | 1.71    | 0.109   | -8.56 to 76.97          |

|                           |        |       |       |       |                 |
|---------------------------|--------|-------|-------|-------|-----------------|
| Time of follow – up: < 4w | 0.99   | 5.06  | 0.20  | 0.847 | -9.79 to 11.77  |
| Time of follow – up: 8w   | -30.45 | 10.72 | -2.84 | 0.012 | -53.30 to -7.60 |
| Cell origin: Xenogeneic   | -5.17  | 8.22  | -0.63 | 0.539 | -22.70 to 12.35 |

**Table S5.** Meta-regression of potential modifiers of LVEDV

| <b>Variable</b>                        | <b>Coefficient</b> | <b>SE</b> | <b>t-value</b> | <b>P-Value</b> | <b>95% Confidence Interval</b> |
|----------------------------------------|--------------------|-----------|----------------|----------------|--------------------------------|
| Animal size: small                     | -13.97             | 4.47      | -3.12          | 0.005          | -23.38 to -4.56                |
| Treatment timing: acute                | 23.77              | 10.84     | 2.19           | 0.04           | 0.98 to 46.55                  |
| Treatment timing: sub-acute            | -37.74             | 14.31     | -2.63          | 0.01           | -67.81 to -7.68                |
| Method delivery: Bio-engineered tissue | -27.47             | 10.82     | -2.53          | 0.02           | -50.21 to -4.72                |
| Method delivery: Intramyocardial       | 13.49              | 8.14      | 1.65           | 0.1            | -3.61 to 30.59                 |
| Time of follow – up: 4w-8w             | -3.59              | 6.94      | -0.51          | 0.61           | -18.18 to 10.99                |
| Time of follow – up: < 4w              | -9.15              | 7.67      | -1.19          | 0.24           | -25.28 to 6.97                 |
| Time of follow – up: > 8w              | -1.2266            | 10.3233   | -0.11          | 0.9            | -22.91 to 20.46                |
| Cell origin: Allogeneic                | -4.71              | 7.11      | -0.67          | 0.51           | -19.72 to 10.18                |
| Cell origin: Xenogeneic                | -9.20              | 5.73      | -1.61          | 0.12           | -21.25 to 2.85                 |
| Disease model: Permanent injury        | -13.97             | 4.47      | -3.12          | 0.006          | -23.38 to -4.56                |
